# Supplementary material for: Unsupervised machine learning to identify subphenotypes among cardiac intensive care unit patients with heart failure
Source: PubMed Central journal article supplement — ESC Heart Fail. 2024 Aug 19;11(6):4242–56. doi: 10.1002/ehf2.15027 (PMC11631334; doi:10.1002/ehf2.15027), 2024-08-19

**SUPPLEMENTAL TABLES AND FIGURES**

**Unsupervised machine learning clustering to identify subphenotypes among cardiac intensive care unit patients with heart failure**

Jacob C. Jentzer, MD<sup>1,2</sup>; Yogesh N. V. Reddy, MD<sup>1</sup>; Sabri Soussi, MD PhD<sup>3,4</sup>; Ruben Crespo-Diaz, MD PhD<sup>1</sup>; Parag C. Patel, MD<sup>5</sup>; Patrick R. Lawler, MD MPH<sup>6</sup>; Alexandre Mebazaa, MD PhD<sup>4,7</sup>; Shannon M. Dunlay, MD MS<sup>1,2</sup>

1 Department of Cardiovascular Medicine, Mayo Clinic, Rochester, MN, USA

2 Robert D. and Patricia E. Kern Center for the Science of Health Care Delivery, Mayo Clinic, Rochester, MN, USA

3 Department of Anesthesia and Pain Management, University Health Network (UHN), University of Toronto, Toronto Western Hospital, ON, Canada

4 Inserm UMR-S 942, Cardiovascular Markers in Stress Conditions (MASCOT), University of Paris, Paris, France

5 Department of Cardiovascular Medicine, Mayo Clinic Florida, Jacksonville, FL

6 Department of Medicine, McGill University Health Centre, Montreal, QC, Canada

7 Université Paris Cité, APHP, FHU PROMICE, Paris, France

**Supplemental Table 1**

**Supplemental Table 2**

**Supplemental Figure 1**

**Supplemental Figure 2**

**Supplemental Figure 3**

**Supplemental Figure 4**

**Supplemental Figure 5**

## Heart failure phenotypes in CICU

**Supplemental Table 1:** Univariable logistic regression models for prediction of in-hospital mortality with all available admission laboratory variables in the final study population.

| Variable                                             | OR     | p value | Lower 95% CI | Upper 95% CI | N    | N missing | AUC   |
|------------------------------------------------------|--------|---------|--------------|--------------|------|-----------|-------|
| <b><i>Complete blood count with differential</i></b> |        |         |              |              |      |           |       |
| Hemoglobin                                           | 0.954  | 0.0258  | 0.915        | 0.994        | 4877 | 0         | 0.539 |
| MCV                                                  | 1.018  | 0.0139  | 1.004        | 1.032        | 4877 | 0         | 0.536 |
| RDW                                                  | 1.134  | < 1e-04 | 1.096        | 1.172        | 4877 | 0         | 0.600 |
| Platelets                                            | 1.000  | 0.5772  | 0.999        | 1.001        | 4877 | 0         | 0.522 |
| WBC                                                  | 1.069  | < 1e-04 | 1.054        | 1.085        | 4877 | 0         | 0.616 |
| Neutrophils                                          | 1.099  | < 1e-04 | 1.081        | 1.118        | 4877 | 0         | 0.649 |
| Lymphocytes                                          | 0.715  | < 1e-04 | 0.615        | 0.826        | 4877 | 0         | 0.607 |
| Monocytes                                            | 1.516  | < 1e-04 | 1.273        | 1.807        | 4877 | 0         | 0.540 |
| Eosinophils                                          | 0.045  | < 1e-04 | 0.016        | 0.120        | 4877 | 0         | 0.616 |
| NLR                                                  | 1.032  | < 1e-04 | 1.025        | 1.039        | 4877 | 0         | 0.677 |
| PMN percent                                          | 17.104 | < 1e-04 | 9.475        | 31.452       | 4877 | 0         | 0.650 |
| Lymph percent                                        | 0.000  | < 1e-04 | 0.000        | 0.001        | 4877 | 0         | 0.672 |
| Mono percent                                         | 0.001  | < 1e-04 | 0.000        | 0.020        | 4877 | 0         | 0.571 |
| Eos percent                                          | 0.000  | < 1e-04 | 0.000        | 0.000        | 4877 | 0         | 0.635 |
| <b><i>Electrolytes and kidney function</i></b>       |        |         |              |              |      |           |       |
| Sodium                                               | 0.945  | < 1e-04 | 0.929        | 0.961        | 4877 | 0         | 0.586 |
| Potassium                                            | 1.324  | < 1e-04 | 1.169        | 1.497        | 4877 | 0         | 0.552 |
| Bicarbonate                                          | 0.967  | 0.0009  | 0.949        | 0.986        | 4877 | 0         | 0.555 |

## Heart failure phenotypes in CICU

| Variable                  | OR    | p value | Lower 95% CI | Upper 95% CI | N    | N missing | AUC   |
|---------------------------|-------|---------|--------------|--------------|------|-----------|-------|
| Chloride                  | 0.950 | < 1e-04 | 0.937        | 0.964        | 4877 | 0         | 0.589 |
| Anion gap                 | 1.119 | < 1e-04 | 1.095        | 1.145        | 4877 | 0         | 0.612 |
| BUN                       | 1.017 | < 1e-04 | 1.014        | 1.021        | 4877 | 0         | 0.642 |
| Creatinine                | 1.174 | < 1e-04 | 1.110        | 1.240        | 4877 | 0         | 0.614 |
| Glucose                   | 1.002 | 0.0017  | 1.001        | 1.003        | 3464 | 1413      | 0.562 |
| Ionized Calcium           | 0.626 | 0.0031  | 0.459        | 0.852        | 1854 | 3023      | 0.577 |
| Phosphorus                | 1.186 | 0.0002  | 1.081        | 1.297        | 2245 | 2632      | 0.516 |
| Magnesium                 | 1.724 | < 1e-04 | 1.315        | 2.249        | 3339 | 1538      | 0.557 |
| <b>Other chemistries</b>  |       |         |              |              |      |           |       |
| Albumin                   | 0.441 | < 1e-04 | 0.343        | 0.565        | 1560 | 3317      | 0.633 |
| AST                       | 1.000 | < 1e-04 | 1.000        | 1.000        | 2682 | 2195      | 0.613 |
| ALT                       | 1.000 | < 1e-04 | 1.000        | 1.001        | 2584 | 2293      | 0.582 |
| Alk phos                  | 1.002 | 0.0007  | 1.001        | 1.004        | 1931 | 2946      | 0.563 |
| Bilirubin                 | 1.104 | 0.0004  | 1.048        | 1.171        | 2111 | 2766      | 0.560 |
| Lactate                   | 1.257 | < 1e-04 | 1.194        | 1.327        | 1691 | 3186      | 0.634 |
| CRP                       | 1.001 | 0.6569  | 0.997        | 1.004        | 438  | 4439      | 0.524 |
| NT-proBNP                 | 1.000 | 0.0003  | 1.000        | 1.000        | 1165 | 3712      | 0.630 |
| Initial troponin T        | 1.022 | 0.2330  | 0.984        | 1.056        | 2901 | 1976      | 0.537 |
| <b>Arterial blood gas</b> |       |         |              |              |      |           |       |
| Arterial pH               | 0.045 | < 1e-04 | 0.013        | 0.163        | 1781 | 3096      | 0.570 |
| Arterial PCO2             | 0.996 | 0.4192  | 0.985        | 1.006        | 1784 | 3093      | 0.524 |

## Heart failure phenotypes in CICU

| <b>Variable</b>      | <b>OR</b> | <b>p value</b> | <b>Lower 95% CI</b> | <b>Upper 95% CI</b> | <b>N</b> | <b>N missing</b> | <b>AUC</b> |
|----------------------|-----------|----------------|---------------------|---------------------|----------|------------------|------------|
| Arterial PO2         | 1.001     | 0.1787         | 0.999               | 1.003               | 2336     | 2541             | 0.505      |
| Arterial Base Excess | 0.933     | < 1e-04        | 0.912               | 0.954               | 1977     | 2900             | 0.608      |
| PF Ratio             | 0.999     | 0.0447         | 0.998               | 1.000               | 1823     | 3054             | 0.549      |

## Heart failure phenotypes in CICU

**Supplemental Table 2:** Baseline characteristics of the final study population and CICU patients with HF who were excluded due to one or missing laboratory variable of interest.

| Variable                         | Excluded HF patients (N=1131) | Final study population (N=4877) | All CICU HF patients (N=6008) | p value |
|----------------------------------|-------------------------------|---------------------------------|-------------------------------|---------|
| <b>Demographics and outcomes</b> |                               |                                 |                               |         |
| Age                              | 70.7 (14.7)                   | 69.4 (14.9)                     | 69.7 (14.8)                   | 0.008   |
| Female sex                       | 451 (39.9%)                   | 1872 (38.4%)                    | 2323 (38.7%)                  | 0.353   |
| White race                       | 1028 (90.9%)                  | 4490 (92.1%)                    | 5518 (91.8%)                  | 0.195   |
| ICU LOS                          | 1.5 (3.4)                     | 3.5 (6.1)                       | 3.1 (5.7)                     | < 0.001 |
| Hospital LOS                     | 9.3 (13.5)                    | 11.2 (17.9)                     | 10.9 (17.2)                   | < 0.001 |
| CICU_death                       | 141 (12.5%)                   | 276 (5.7%)                      | 417 (6.9%)                    | < 0.001 |
| Early death                      | 96 (8.5%)                     | 44 (0.9%)                       | 140 (2.3%)                    | < 0.001 |
| Hospital_death                   | 212 (18.7%)                   | 524 (10.7%)                     | 736 (12.3%)                   | < 0.001 |
| <b>Severity of illness</b>       |                               |                                 |                               |         |
| APACHE-3 score                   | 66.7 (28.8)                   | 67.6 (23.3)                     | 67.4 (24.5)                   | 0.306   |
| Day 1 SOFA score                 | 4.2 (3.8)                     | 4.4 (3.2)                       | 4.4 (3.3)                     | 0.086   |
| MCARS                            | 2.7 (2.2)                     | 3.0 (2.1)                       | 2.9 (2.1)                     | < 0.001 |
| Braden score                     | 17.1 (3.5)                    | 17.2 (3.4)                      | 17.2 (3.4)                    | 0.372   |
| LVSD based on LVEF               |                               |                                 |                               | 0.445   |
| - Normal                         | 235 (30.2%)                   | 1068 (29.0%)                    | 1303 (29.2%)                  |         |
| - Mild LVSD                      | 114 (14.6%)                   | 538 (14.6%)                     | 652 (14.6%)                   |         |
| - Moderate LVSD                  | 178 (22.8%)                   | 940 (25.6%)                     | 1118 (25.1%)                  |         |
| - Severe LVSD                    | 252 (32.3%)                   | 1132 (30.8%)                    | 1384 (31.1%)                  |         |

## Heart failure phenotypes in CICU

| Variable                   | Excluded HF patients (N=1131) | Final study population (N=4877) | All CICU HF patients (N=6008) | p value |
|----------------------------|-------------------------------|---------------------------------|-------------------------------|---------|
| SCAI shock stage           |                               |                                 |                               | < 0.001 |
| - A                        | 299 (34.1%)                   | 1376 (37.3%)                    | 1675 (36.7%)                  |         |
| - B                        | 310 (35.4%)                   | 1252 (33.9%)                    | 1562 (34.2%)                  |         |
| - C                        | 128 (14.6%)                   | 630 (17.1%)                     | 758 (16.6%)                   |         |
| - D                        | 114 (13.0%)                   | 399 (10.8%)                     | 513 (11.2%)                   |         |
| - E                        | 25 (2.9%)                     | 31 (0.8%)                       | 56 (1.2%)                     |         |
| <b>Comorbidities</b>       |                               |                                 |                               |         |
| Prior MI                   | 225 (19.9%)                   | 1100 (22.6%)                    | 1325 (22.1%)                  | 0.052   |
| Prior HF                   | 433 (38.4%)                   | 1792 (36.8%)                    | 2225 (37.1%)                  | 0.329   |
| CCI                        | 3.0 (2.8)                     | 3.0 (2.8)                       | 3.0 (2.8)                     | 0.997   |
| Prior DM                   | 372 (33.0%)                   | 1720 (35.3%)                    | 2092 (34.9%)                  | 0.133   |
| Prior lung disease         | 264 (23.4%)                   | 1151 (23.7%)                    | 1415 (23.6%)                  | 0.859   |
| CKD                        | 319 (28.3%)                   | 1462 (30.0%)                    | 1781 (29.7%)                  | 0.242   |
| Prior dialysis             | 58 (5.1%)                     | 365 (7.5%)                      | 423 (7.0%)                    | 0.005   |
| Ischemic etiology          | 512 (45.4%)                   | 2415 (49.6%)                    | 2927 (48.8%)                  | 0.010   |
| <b>Admission diagnoses</b> |                               |                                 |                               |         |
| Cardiac arrest             | 169 (14.9%)                   | 615 (12.6%)                     | 784 (13.0%)                   | 0.036   |
| Shock                      | 279 (24.7%)                   | 1083 (22.2%)                    | 1362 (22.7%)                  | 0.075   |
| CS                         | 234 (20.7%)                   | 900 (18.5%)                     | 1134 (18.9%)                  | 0.083   |
| Sepsis                     | 84 (7.4%)                     | 454 (9.3%)                      | 538 (9.0%)                    | 0.046   |

## Heart failure phenotypes in CICU

| Variable                           | Excluded HF patients (N=1131) | Final study population (N=4877) | All CICU HF patients (N=6008) | p value |
|------------------------------------|-------------------------------|---------------------------------|-------------------------------|---------|
| Respiratory failure                | 385 (34.0%)                   | 1858 (38.1%)                    | 2243 (37.3%)                  | 0.011   |
| ACS                                | 384 (34.0%)                   | 1779 (36.5%)                    | 2163 (36.0%)                  | 0.111   |
| STEMI                              | 188 (16.6%)                   | 883 (18.1%)                     | 1071 (17.8%)                  | 0.240   |
| <b>Procedures and therapies</b>    |                               |                                 |                               |         |
| IMV                                | 217 (19.2%)                   | 1093 (22.4%)                    | 1310 (21.8%)                  | 0.018   |
| NIPPV                              | 182 (16.1%)                   | 1295 (26.6%)                    | 1477 (24.6%)                  | < 0.001 |
| CRRT                               | 24 (2.1%)                     | 181 (3.7%)                      | 205 (3.4%)                    | 0.008   |
| Dialysis                           | 91 (8.0%)                     | 384 (7.9%)                      | 475 (7.9%)                    | 0.847   |
| Vasopressors                       | 381 (33.7%)                   | 1372 (28.1%)                    | 1753 (29.2%)                  | < 0.001 |
| Inotropes                          | 190 (16.8%)                   | 805 (16.5%)                     | 995 (16.6%)                   | 0.811   |
| Vasoactives                        | 444 (39.3%)                   | 1750 (35.9%)                    | 2194 (36.5%)                  | 0.034   |
| IABP                               | 123 (10.9%)                   | 600 (12.3%)                     | 723 (12.0%)                   | 0.184   |
| Impella/ECMO                       | 14 (1.2%)                     | 67 (1.4%)                       | 81 (1.3%)                     | 0.721   |
| PAC                                | 150 (13.3%)                   | 865 (17.7%)                     | 1015 (16.9%)                  | < 0.001 |
| Cath                               | 572 (50.6%)                   | 2696 (55.3%)                    | 3268 (54.4%)                  | 0.004   |
| PCI                                | 288 (25.5%)                   | 1244 (25.5%)                    | 1532 (25.5%)                  | 0.976   |
| Transfusion                        | 119 (10.5%)                   | 694 (14.2%)                     | 813 (13.5%)                   | 0.001   |
| IHCA                               | 46 (4.1%)                     | 120 (2.5%)                      | 166 (2.8%)                    | 0.003   |
| <b>Admission laboratory values</b> |                               |                                 |                               |         |
| Sodium                             | 137.4 (5.2)                   | 137.5 (4.8)                     | 137.5 (4.9)                   | 0.320   |

## Heart failure phenotypes in CICU

| Variable    | Excluded HF patients (N=1131) | Final study population (N=4877) | All CICU HF patients (N=6008) | p value |
|-------------|-------------------------------|---------------------------------|-------------------------------|---------|
| Potassium   | 4.3 (0.7)                     | 4.3 (0.7)                       | 4.3 (0.7)                     | 0.324   |
| Bicarbonate | 24.0 (5.3)                    | 24.1 (4.8)                      | 24.1 (4.9)                    | 0.651   |
| BUN         | 33.0 (22.1)                   | 32.9 (21.5)                     | 32.9 (21.6)                   | 0.856   |
| Creatinine  | 1.6 (1.1)                     | 1.6 (1.3)                       | 1.6 (1.3)                     | 0.274   |
| Hemoglobin  | 11.5 (2.2)                    | 11.8 (2.2)                      | 11.7 (2.2)                    | 0.005   |
| Platelets   | 208.5 (106.1)                 | 208.2 (87.6)                    | 208.2 (90.8)                  | 0.935   |
| Chloride    | 101.2 (6.2)                   | 100.8 (6.0)                     | 100.9 (6.0)                   | 0.066   |
| Anion Gap   | 13.3 (4.4)                    | 13.2 (3.7)                      | 13.2 (3.8)                    | 0.459   |
| MCV         | 91.7 (7.6)                    | 90.9 (6.6)                      | 91.0 (6.7)                    | 0.001   |
| RDW         | 15.9 (2.8)                    | 15.4 (2.3)                      | 15.5 (2.4)                    | < 0.001 |
| WBC         | 11.7 (13.3)                   | 10.8 (6.0)                      | 10.9 (7.6)                    | 0.001   |
| NLR         | 11.4 (12.1)                   | 10.1 (11.1)                     | 10.2 (11.1)                   | 0.074   |



## Heart failure phenotypes in CICU

**Supplemental Figure 1:** Correlation matrix showing Pearson correlations among selected candidate laboratory feature variables in the final study cohort, with web plot demonstrating these same data.

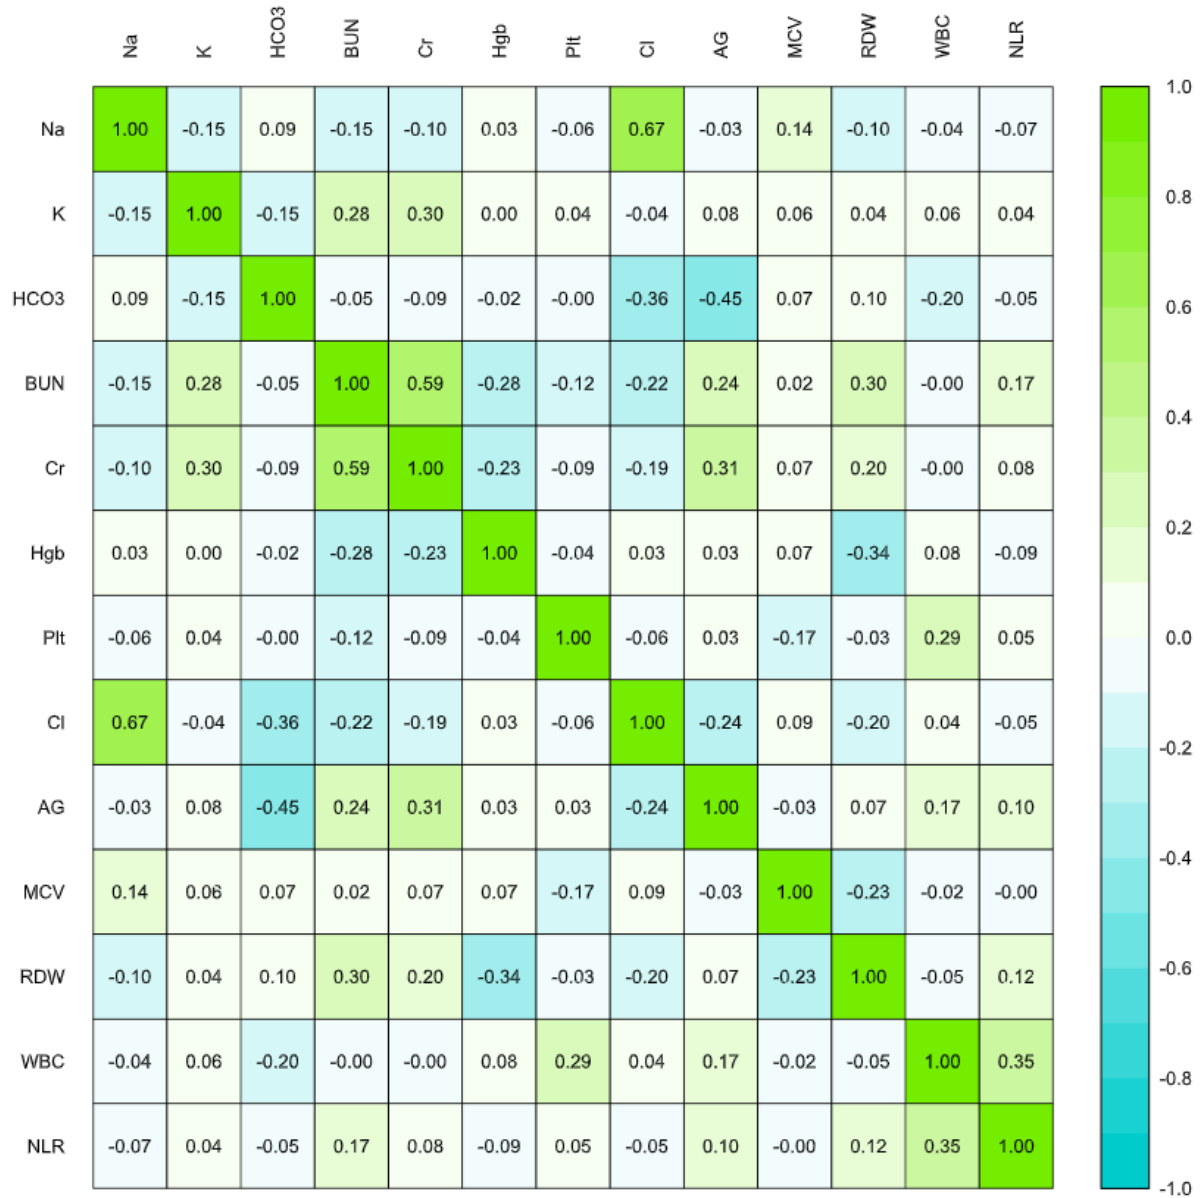

# Heart failure phenotypes in CICU

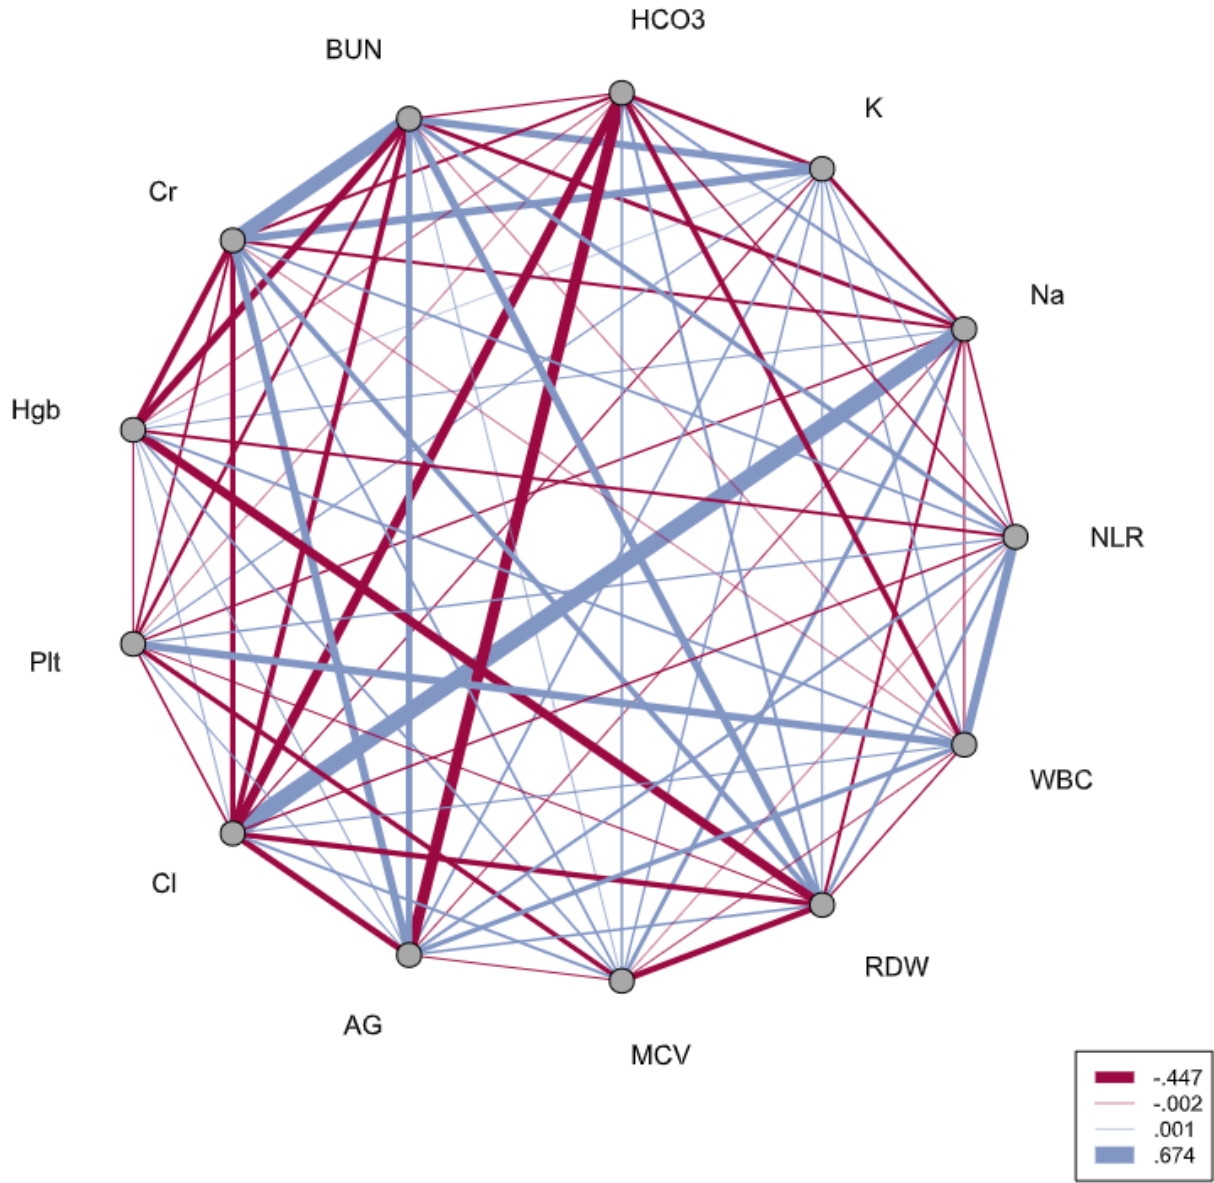

**Supplemental Figure 2:** Elbow plot demonstrating the between-clusters and within-clusters sum of squares, demonstrating a subtle inflection point at 5 clusters.

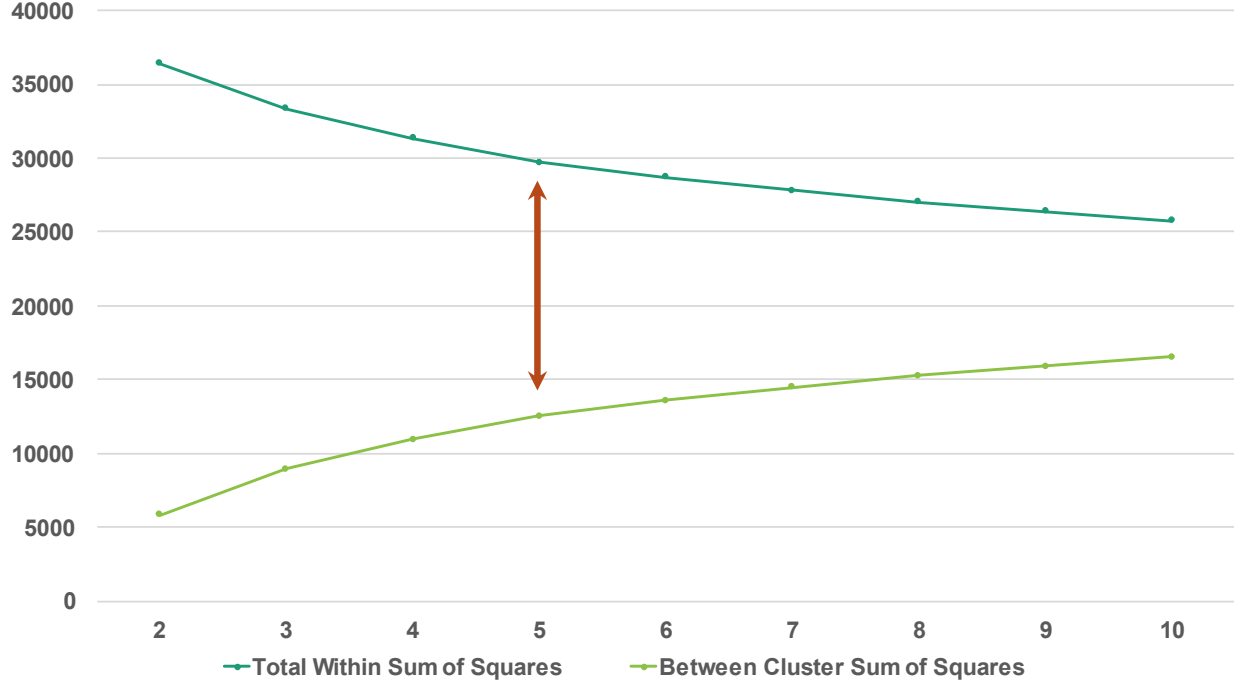

## Heart failure phenotypes in CICU

**Supplemental Figure 3:** Distribution of clusters according to patient characteristics. Cluster 1 = Inflamed; Cluster 2 = Hypoperfused; Cluster 3 = Uncomplicated; Cluster 4 = Iron-Deficient; Cluster 5 = Cardiorenal.

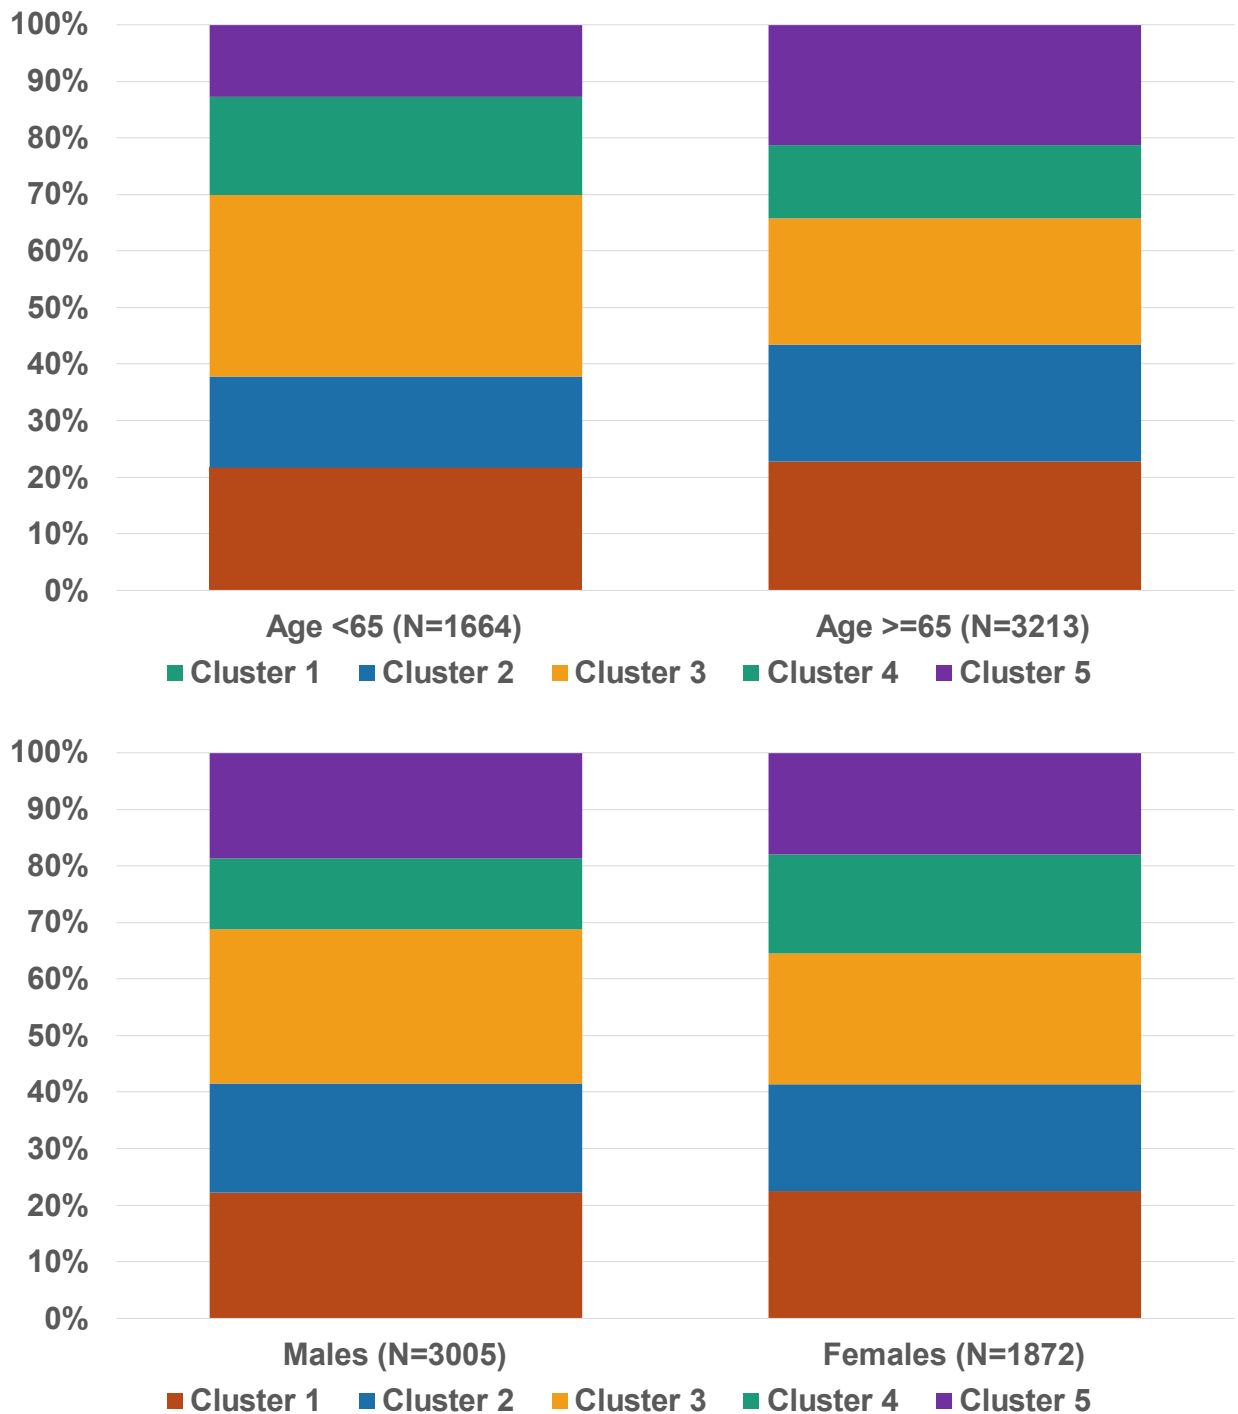

# Heart failure phenotypes in CICU

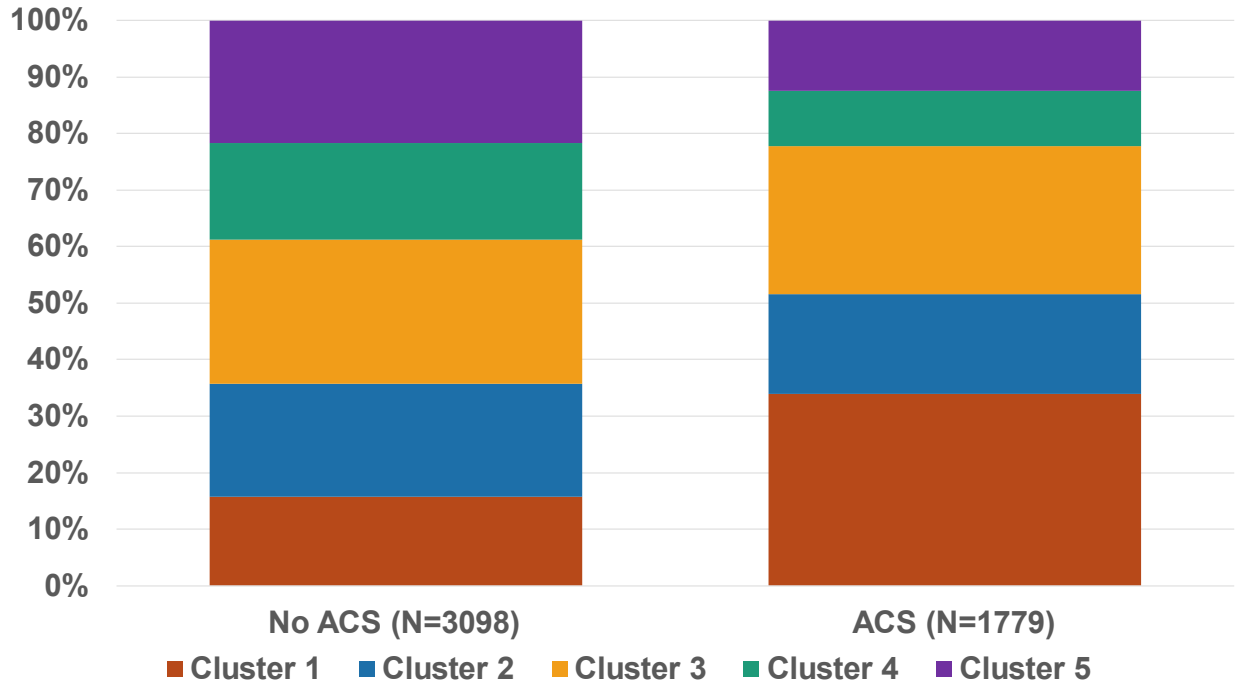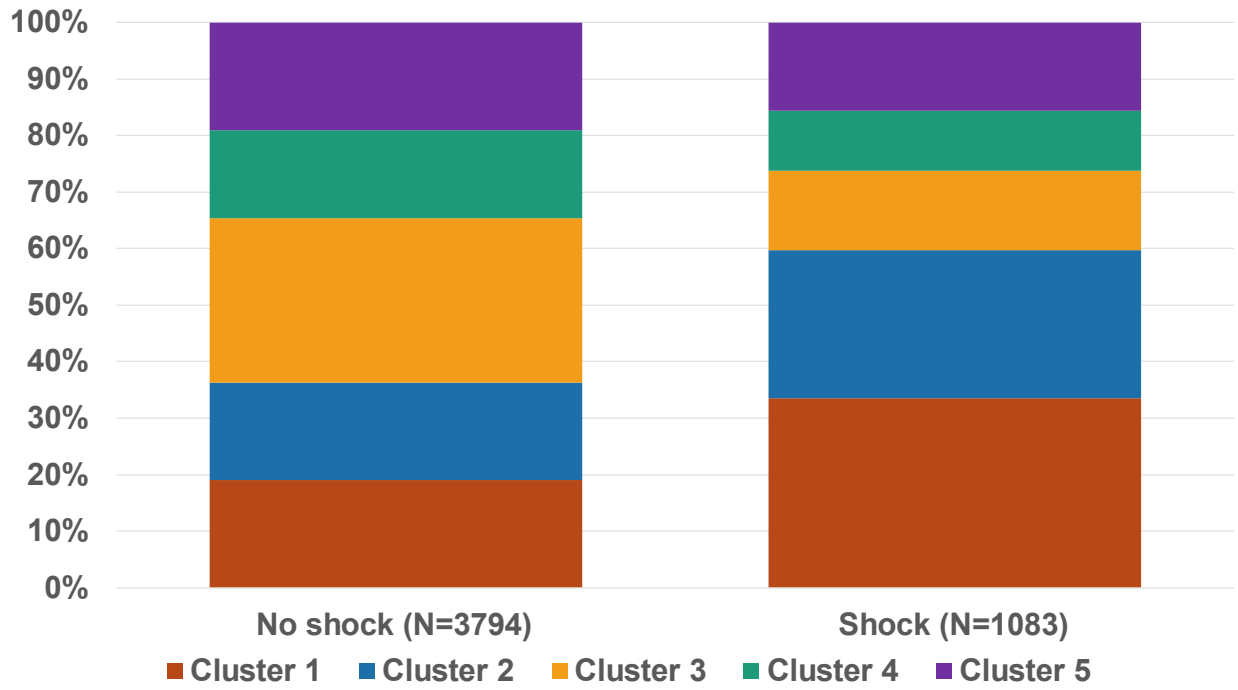

## Heart failure phenotypes in CICU

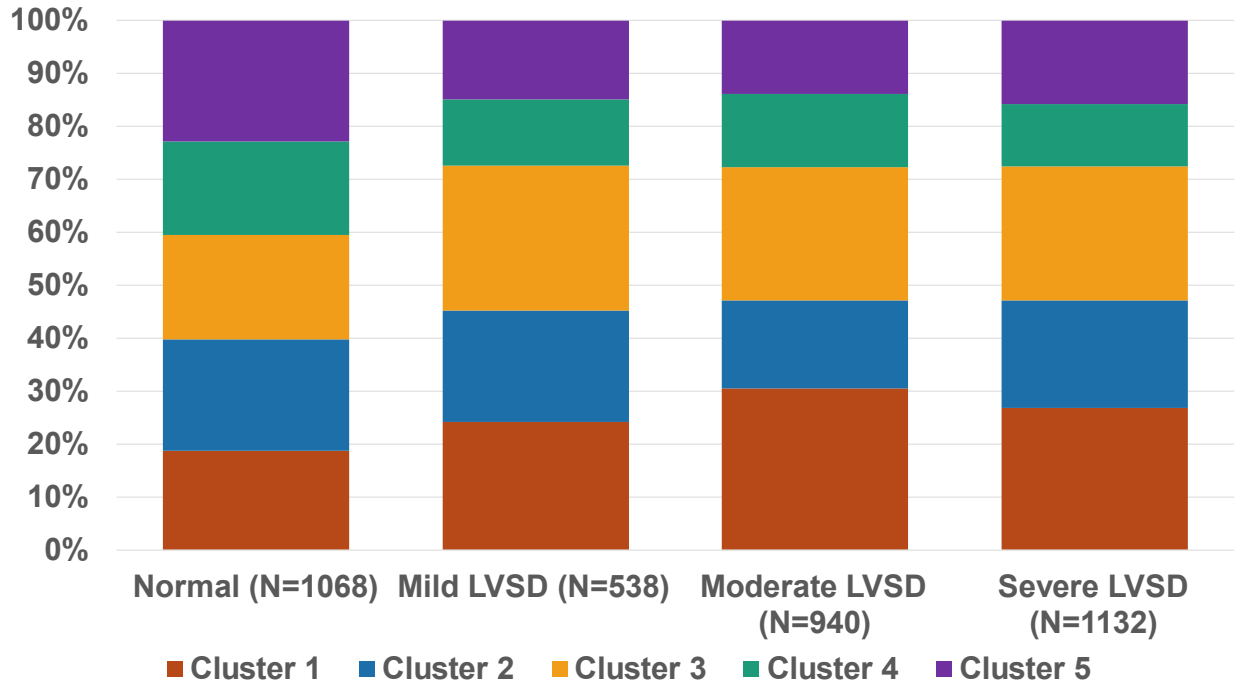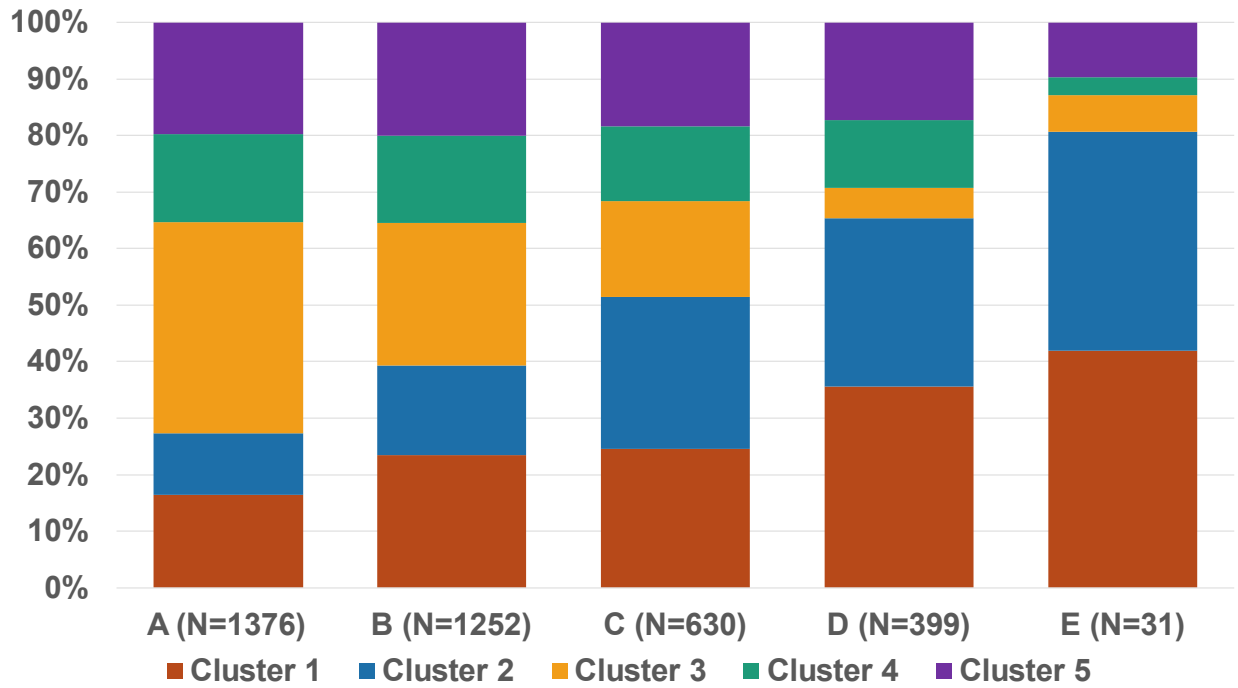

Heart failure phenotypes in CICU

**Supplemental Figure 4:** In-hospital mortality according to subphenotype and etiology (ischemic versus nonischemic) or pattern (de novo versus acute on chronic) HF.

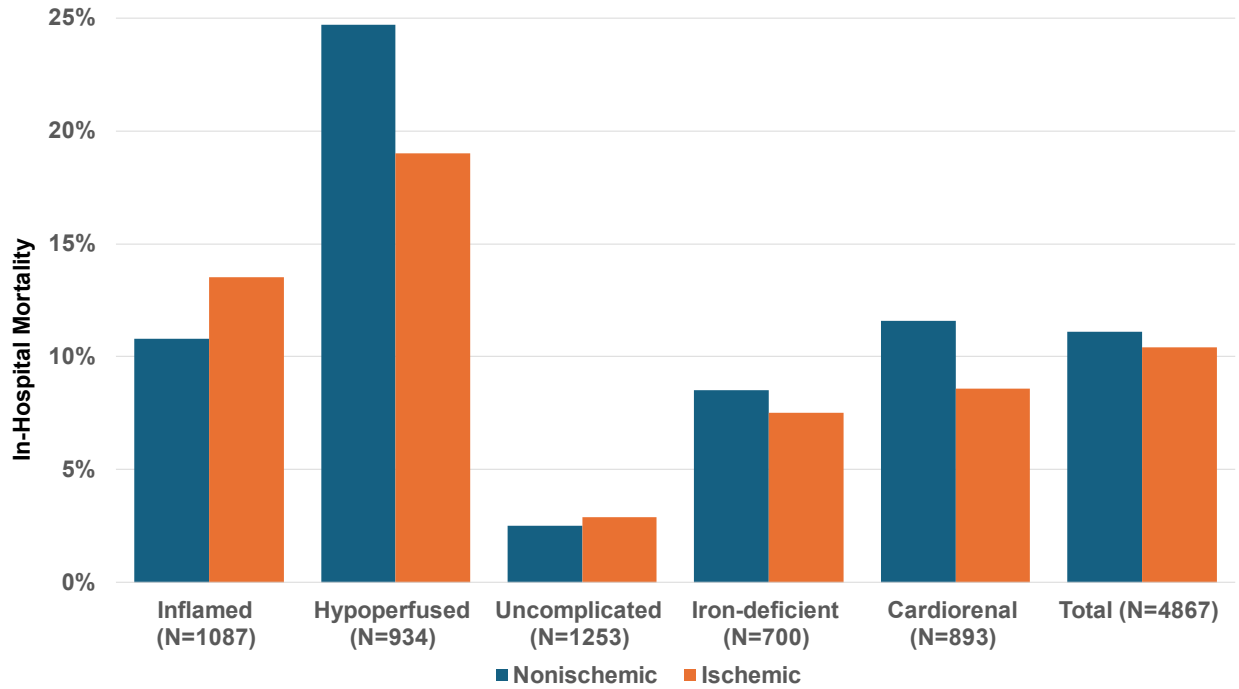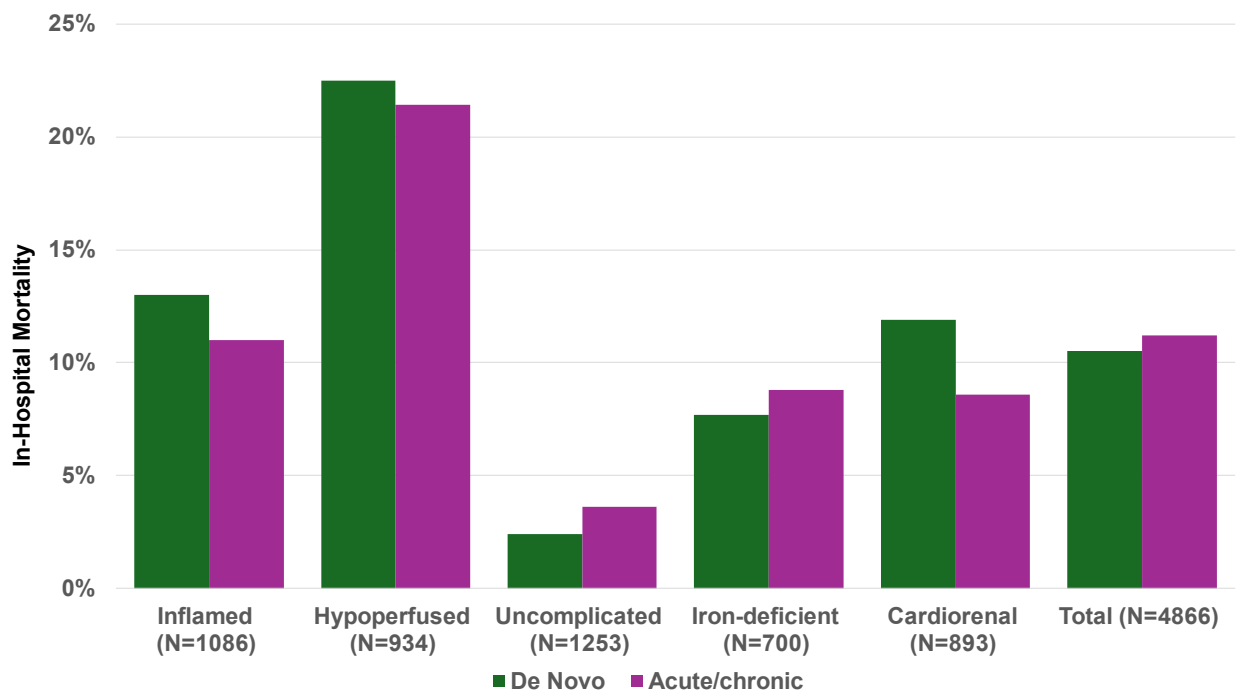

## Heart failure phenotypes in CICU

**Supplemental Figure 5:** In-hospital mortality according to subphenotype and pattern of ventricular dysfunction based on moderate or greater RV and LV dysfunction by TTE.

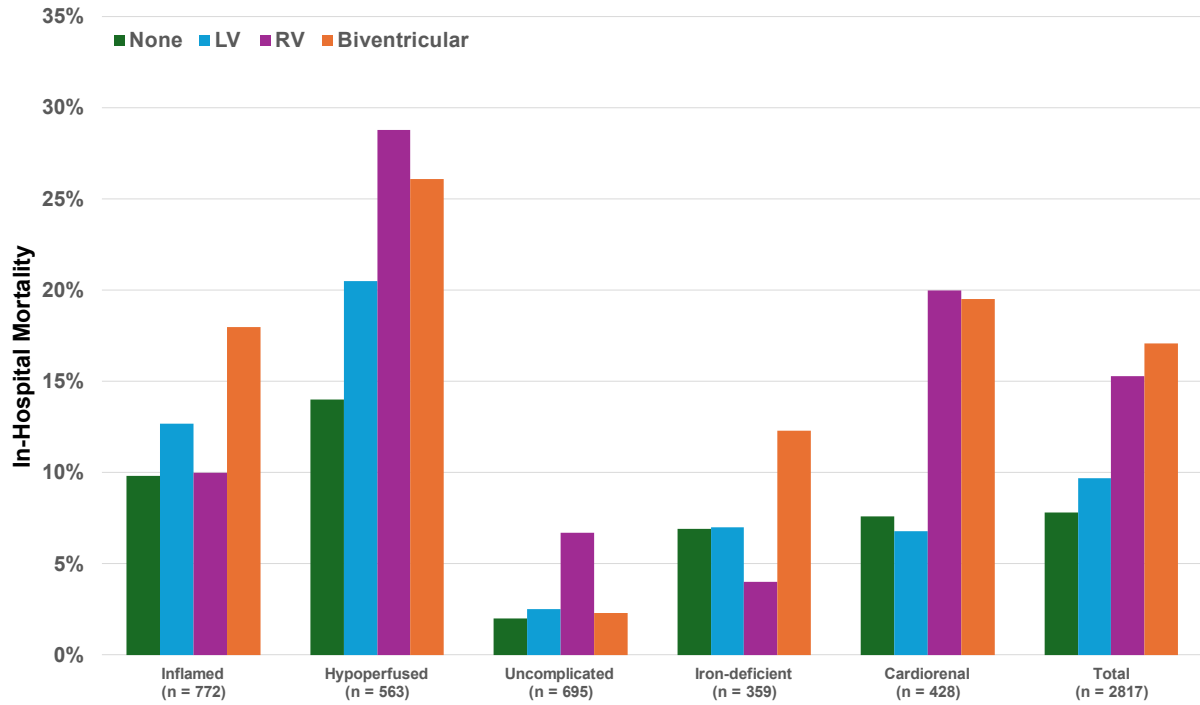

Supplement: EHF2-11-4242-s001.pdf [file EHF2-11-4242-s001.pdf]
